# Supplementary material
Source: publisher site journal article supplement (https://www.dovepress.com/article/313045)
Supplement: Supplementary file 1 [file get_supplementary_file.php]

# Supplementary Material

**Investigational sites**

| **US Investigational sites** |
| --- |
| Highlands Oncology Group, Fayetteville, AR |
| Genesis Cancer Center, Hot Springs, AZ |
| Ironwood Cancer & Research Center, Chandler, AZ |
| Beverly Hills Cancer Center, Beverly Hills, CA |
| St Joseph Heritage Healthcare, Santa Rosa, CA |
| Singing River Health System, Whittier, CA |
| Innovative Clinical Research Institute (ICRI), Whittier, CA |
| Compassionate Cancer Care Medical Group, Corona, CA |
| Memorial Hospital, Colorado Springs, CO |
| Cancer Care & Hematology, Fort Collins, CO |
| Rocky Mountain Cancer Center, Denver, CO |
| Florida Cancer Specialists, Fort Myers, FL |
| Florida Cancer Specialists, West Palm Beach, FL |
| Florida Cancer Specialists, St. Petersburg, FL |
| Boca Raton Regional Hospital Lynn Cancer Institute, Boca Raton, FL |
| Sylvester Comprehensive Cancer Center, Miami, FL |
| Sara Cannon/Florida Cancer Specialist-South, Fort Myers, FL |
| Sara Cannon/Florida Cancer Specialist-East, West Palm Beach, FL |
| Sara Cannon/Florida Cancer Specialist-North, Tavares, FL |
| Winship Cancer Institute, Emory University, Atlanta, GA |
| Northside Hospital, Inc., Atlanta, GA |
| Piedmont Cancer Institute, Atlanta, GA |
| University Cancer & Blood Center, Athens, GA |
| Norton Cancer Institute, Norton Healthcare Pavilion, Louisville, KY |
| The Center for Cancer and Blood Disorders, Bethesda, MD |
| Saint Luke's Hospital, Kansas City, MO |
| University of North Carolina at Chapel Hill, Chapel Hill, NC |
| Regional Medical Oncology Center, Wilson, NC |
| Dartmouth-Hitchcock Medical Center, Lebanon, NH |
| Summit Medical Group, P.A., Morristown, NJ |
| University of New Mexico Comprehensive Cancer Center, Albuquerque, NM |
| Roswell Park Cancer Institute, Buffalo, NY |
| Gabrail Cancer Center Research, Canton, OH |
| Stephenson Cancer Center, Oklahoma City, OK |
| Guthrie Medical Group, Sayre, PA |
| Thomas Jefferson University Hospital, Philadelphia, PA |
| Greenville Health System, Greensville, SC |
| Spartansburg Medical Center, Spartansburg, SC |
| Sara Cannon/Tennessee Oncology, Chattanooga, TN |
| Sara Cannon/Tennessee Oncology-Nashville, Nashville |
| University of Tennessee Medical Center, Knoxville, TN |
| Meharry Medical College, Nashville, TN |
| Tennessee Cancer Specialists, Knoxville, TN |
| Tennessee Oncology, Nashville, TN |
| Texas Oncology, Tyler, TX |
| The University of Texas MD Anderson Cancer Center, Houston, TX |
| Millennium Oncology, Houston, TX |
| Virginia Cancer Specialists, Fairfax, VA |
| Virginia Oncology Associates, Norfolk, VA |
| Blue Ridge Cancer Care, Blacksburg, VA |
| Fairfax-Northern Virginia Hematology-Oncology PC, Arlington, VA |
| Northwest Cancer Specialists, Vancouver, WA |
| **Ex-USA Investigational sites** |
| AZ Klina, Antwerp, Belgium |
| Complex Oncology Center, Burgas, Bulgaria |
| Multiprofile Hospital for Active Treatment, Serdika, Bulgaria |
| Tokuda Hospital, Sofia, Bulgaria |
| University Hospital Centre Zagreb, Croatia |
| East Tallinn Central Hospital Ltd., Tallinn, Estonia |
| Tartu University Hospital, Tartu, Estonia |
| CHU de Rennes - Hopital de Pontchaillou, France |
| Centre Hospitalier de la côte Basque, Bayonne, France |
| LLC ARENSIA Exploratory Medicine, Georgia |
| Georgia LTD Research Institute of Clinical Medicine, Tbilisi, Georgia |
| Georgia, LTD Clinical Oncology Center, Georgia |
| Georgia LTD Institute for Personalized Medicine, Tbilisi, Georgia |
| LTD Cancer Research Centre, Tbilisi, Georgia |
| Veszprem Megyei Tudogyogyintezet, Hungary |
| Hetenyi Geza Korhaz, Hungary |
| Orszagos Koranyi TBC es Pulmonologiai Intezet, Budapest, Hungary |
| Daugavpils Regional Hospital, Daugavpils, Latvia |
| P. Stradins Clinical University Hospital, Riga, Latvia |
| Riga East University Hospital, LLC, Riga, Latvia |
| University Clinic of Radiotherapy and Oncology, Skopje, Republic of Macedonia |
| ARENSIA Exploratory Medicine Phase I Unit, The Institute of Oncology, Moldova |
| Wojewodzki Szpital Zespolony im. L. Rydygiera w Toruniu, Poland |
| Samodzielny Publiczny Zespol Gruzlicy i Chorob Pluc w Olsztynie, Poland |
| Institute for Pulmonary Diseases of Vojvodina, Serbia |
| Clinical Center Nis, Serbia |
| Institute for Oncology and Radiology of Serbia, Serbia |
| Clinical Center of Serbia, Serbia |
| Clinical Hospital Center "Bezanijska Kosa", Serbia |
| Hospital Provincial de Castellon, Spain |
| Hgu Gregorio Maranon, Spain |
| Hospital de la Santa Creu i Sant Pau, Spain |
| Hospital Universitario Fundacion Jimenez Diaz, Spain |
| H.U. Quirón Dexeus, Hospital Universitario, Quirón Dexeus, Spain |
| Hospital Teresa Herrera, Xerencia de Xestión Integrada A Coruña, Spain |
| Dnipropetrovsk City Multispecialty Clinical Hospital #4, Dnipro, Ukraine |
| Chernivtsi Regional Clinical Oncology Center, Chernivtsi, Ukraine |
| Volyn Regional Oncology Center, Lutsk, Ukraine |
| Ternopil Regional Public Clinical Oncology Center, Ternopil, Ukraine |
| Sumy Regional Clinical Oncology Center, Sumy, Ukraine |

**Supplementary Methods**

Risk factor subgroups for febrile neutropenia (FN):

- Age ≥65 years
- Poor nutritional status (if baseline albumin is <3.5 g/dL)
- Renal dysfunction (if any of the preferred terms [PTs] listed below are present in medical history)

| **Category** | **PTs** |
| --- | --- |
| Renal dysfunction | Chronic kidney disease |
|  | Diabetic end-stage renal disease |
|  | End-stage renal disease |
|  | Renal impairment |
|  | Glomerulonephritis chronic |
|  | Chronic autoimmune glomerulonephritis |
|  | Nephrosclerosis |
|  | Nephrotic syndrome |
|  | Acute glomerulonephritis |

- Cardiovascular disease (if any of the following high-level terms [HLTs] are present in medical history)

| **Category** | **HLTs** |
| --- | --- |
| Cardiovascular disease | Heart failure necrotizing enterocolitis |
|  | Left ventricular failure |
|  | Right ventricular failure |
|  | Ischemic coronary artery disorders |
|  | Coronary necrosis and vascular insufficiency |

- Multiple comorbid conditions (if any of the following terms [HLT or PT] are present in medical history)

| **Category** | **PTs** |
| --- | --- |
| Multiple comorbid conditions | Chronic kidney disease |
|  | Diabetic end-stage renal disease |
|  | End-stage renal disease |
|  | Renal impairment |
|  | Glomerulonephritis chronic |
|  | Chronic autoimmune glomerulonephritis |
|  | Nephrosclerosis |
|  | Nephrotic syndrome |
|  | Acute glomerulonephritis |
|  | Osteoarthritis |
|  | Bronchitis chronic |
|  | Chronic obstructive pulmonary disease |
|  | Asthma – chronic obstructive pulmonary disease overlap syndrome |
|  | Emphysema |
|  | Asthma |
|  | Bronchiectasis |
|  | Autoimmune colitis |
|  | Crohn’s disease |
|  | Colitis ulcerative |
|  | Multiple sclerosis |
|  | **HLTs** |
|  | Heart failure necrotizing enterocolitis |
|  | Left ventricular failure |
|  | Right ventricular failure |
|  | Ischemic coronary artery disorders |
|  | Coronary necrosis and vascular insufficiency |
|  | Lupus erythematosus and associated conditions |
|  | Lupus erythematosus (including subtypes) |
|  | Multiple sclerosis acute and progressive |
|  | Duodenal ulcers and perforation |
|  | Gastric ulcers and perforation |
|  | Peptic ulcers and perforation |
|  | Acute and chronic thyroiditis |
|  | Thyroid hypofunction disorders |
|  | Thyroid hyperfunction disorders |

- For patients enrolled in study G1T28-03, an additional factor related to the risk of FN is identified as previous cytotoxic chemotherapy (defined by any of the following prior small cell lung cancer therapies coded by World Health Organization Drug Dictionary [WHO-DD] preferred names)

| **Category** | **WHO-DD Preferred Names** |
| --- | --- |
| Previous cytotoxic chemotherapy | Carboplatin |
|  | Cisplatin |
|  | Cyclophosphamide |
|  | Doxorubicin |
|  | Etoposide |
|  | Irinotecan |
|  | Lurbinectedin |
|  | Platinum |
|  | Prexasertib |
|  | Veliparib |
|  | Vincristine |
